# Supplementary material for: An App to Improve Eating Habits of Adolescents and Young Adults (Challenge to Go): Systematic Development of a Theory-Based and Target Group–Adapted Mobile App Intervention
Source: PubMed Central journal article supplement (PMC6709564; doi:10.2196/11575), 2019-08-12
Supplement: mhealth_v7i8e11575_app3.pdf [file mhealth_v7i8e11575_app3.pdf]

## Multimedia Appendix 3. Results of studies 1 and 2

### Results study 1 (n= 11)

#### Nutritional habits

- Food shopping: Yes or no
- Breakfast: Either at home, on the road, at school or not at all (lack of hunger)
- Lunch: Self-made sandwiches, self-cooked meals, food of the cafeteria/canteen or not at all
- Dinner: Something warm or cold
- Snacks: Yes (fruits, cake, ice cream, biscuits) or no
- Beverages: Much or little, coffee or not
- Influences on nutrition habits: Family (meals), friends, offer in canteen, time, cooking skills, preferences, financial opportunities, hunger, life situation (see Change in nutrition behavior) recipe apps and websites, stress in school or university, "everyday wisdoms", missing self-confidence
- Change in nutrition behavior (intrapersonal): Pregnancy vs. non-pregnancy, fasting time vs. non-fasting time, weekdays vs. vacation/weekend, visit to the grandma's house vs. eating at home or high school time vs. time after high school

#### Mobile phone and app usage

- Mobile phone is used for entertainment:  
Playing games, e.g. Color Switch, Doodle Jump, Quizduell, Pokémon Go, Block! Hexa, card games, looking YouTube Videos, listening to music
- Mobile phone is used when bored
- Mobile phone is used for communication with family and friends:  
Phone calls, messages via WhatsApp, Facebook, iMessenger, Instagram, SMS, emails, sharing of pictures
- Mobile phone is used as tool for every day relief:  
Google maps, menu app for canteen menu, as clock, dietary mobile app for weight management, camera functions, internet research, app that helps learning bible verses by heart, tuner for guitar, no costs for some apps
- Memory of mobile phone limits app use

#### Nutritional improvement wishes and strategies

| Nutritional improvement wishes             | Nutritional support strategies                                                                                                                                                                                  |
|--------------------------------------------|-----------------------------------------------------------------------------------------------------------------------------------------------------------------------------------------------------------------|
| Regular warm lunches; e.g. lunch at school | More time to cook; support from friends and family                                                                                                                                                              |
| Eating healthier                           | Support from friends and family; more self-control/motivation; more self-confidence; support and motivation by dietary mobile app; alternative food ideas; offer of fruits and vegetables in the school canteen |
| Eating fewer incompatible foods            | Shopping aid for finding lactose-free products quickly; broader offer of lactose-free products in supermarkets; financial support; more self-control/motivation                                                 |
| Less sweets                                | alternative food ideas; support by dietary mobile app that displays consumption                                                                                                                                 |

|                            |                                                                                             |
|----------------------------|---------------------------------------------------------------------------------------------|
| Smaller portion sizes      | Tracking of consumption                                                                     |
| More fruit and vegetables  | Support through dietary mobile app                                                          |
| Drinking better            | Support through dietary mobile app                                                          |
| Learn to cook              | Practice cooking                                                                            |
| Maintain weight            | Appropriate eating environment; more self-control/motivation                                |
| Lose Weight                | Support from friends and family; alternative food ideas; support through dietary mobile app |
| Cooking more often freshly | Cooking inspiration (e.g. healthy recipes)                                                  |

### Nutritional values

- Food shopping: Organic and regional food
- Food shopping: Unpacked food
- Food shopping: Buying meat from animal welfare
- Food shopping: Appealing appearance of mid-life/packaging
- Food shopping: Natural food ingredients
- Food shopping: Fresh with fruits/vegetables
- Food shopping: Spending on food should be kept low
- Food consumption: Satisfy physiological needs
- Food consumption: Taste and preferences
- Food consumption: Compatibility of food
- Food consumption: Pleasure food instead of abandonment
- Food consumption: To try something new
- Food consumption: Uncomplicated, easy-going
- Food consumption: Varied, balanced diet
- Food consumption: Less stress in school
- Food consumption: Support from family
- Food consumption: Appropriate eating environment
- Food consumption: Follow nutritional guidelines
- Food consumption: Structuring of daily eating
- Cooking: Little effort when cooking (e.g. in the evening after work)
- Cooking: Conviviality when cooking
- Cooking: Cooking for fun, challenge and good feelings
- Cooking: Independent buying/eating decisions
- Cooking: Cooking stands for independency
- Nutritional goals: Building muscle through nutrition
- Nutritional goals: Energy/concentration
- Nutritional goals: Fitness, performance and concentration through a healthy diet
- Nutritional goals: Disease prevention
- Nutritional goals: Strengthen your immune system
- Nutritional goals: Lose body weight
- Nutritional goals: High enough body weight

### Understanding of health

| What is healthy? | What is unhealthy? |
|------------------|--------------------|
| Sports           | Frozen products    |

|                                                                     |                                                  |
|---------------------------------------------------------------------|--------------------------------------------------|
| Moving in fresh air                                                 | Snacks                                           |
| Conscious eating and taking time                                    | Cola                                             |
| Rice/noodles and others grain products                              | Crisps                                           |
| Fresh food                                                          | Fast food chains                                 |
| Beverages: Drinking enough and water                                | Snacking: Sweet and salty snacks and too much    |
| Regularly eating                                                    | Ready meals, e.g. Pizza                          |
| Hearty food with a little sweet for nutrients                       | Sweets, e.g. gummy bear                          |
| Freshly cooked food                                                 | Nutella                                          |
| Balanced eating                                                     | French fries                                     |
| Vegetables and fruits                                               | Meat: Too much and e.g. pork meat                |
| High in fiber                                                       | Greasy food                                      |
| Less fat                                                            | Unconscious eating                               |
| Self-cooking for the baby better than a glass                       | You should not eat so much of unhealthy foods    |
| Diet and exercise together are part of a healthy lifestyle          | Unhealthy fast food is allowed from time to time |
| A healthy diet is a challenge                                       |                                                  |
| Health level of the nutrition behavior is from day to day different |                                                  |
| Healthy foods are not consumed when they do not taste good          |                                                  |

#### Assessment of estimated effect of a healthy lifestyle

- Healthy diet: Nutrient supply; disease prevention/strengthening immune system; no bloating; does the body good: Conserves and cares; satiety; fitness; performance; concentration; weight loss; self-cooked; healthy diet (participant found no other explanation)
- Exercise: For well-being

#### Assessment of the estimated effect of an unhealthy lifestyle

- Unhealthy eating: No need for the body; does not do well and hurts your health; makes you fat; influences the behavior; impact on body in digestion; low importance and risk perception regarding health consequences

#### Test app experiences

| Advantages                                                                                                                      | Disadvantages                            | Improvement suggestions                                 |
|---------------------------------------------------------------------------------------------------------------------------------|------------------------------------------|---------------------------------------------------------|
| Simple tracking with serving sizes for certain foods: Fruits, water                                                             | Estimation of portion sizes:<br>Not easy | Serving sizes: More accurate definition and description |
| App use influenced nutrition behavior positively: More drinking, fruits and vegetables, less sweets, less lactose-free products |                                          |                                                         |
| App can be used to track consumption, instead of manually logging consumption to control portion size                           |                                          |                                                         |

|                                                                                                                     |                                                                                                                                        |                                                                    |
|---------------------------------------------------------------------------------------------------------------------|----------------------------------------------------------------------------------------------------------------------------------------|--------------------------------------------------------------------|
| App usable to kill boredom (e.g. visual feedback seen)                                                              |                                                                                                                                        |                                                                    |
| Searching and tracking food with a drop-down list facilitates tracking                                              | Search problems                                                                                                                        | Search system: By voice input<br>Search system: Category-based     |
| Setting goals: Personalizing and motivating                                                                         | Setting goals by users make sense?                                                                                                     | Pretend goals through dietary mobile app, instead of by users      |
| Great food database: Facilitates tracking                                                                           | Food database: Not complete                                                                                                            | Expand food database                                               |
| Menu item for information on serving sizes are helpful                                                              | High usage effort through tracking (as result not everything was tracked): Tedious and time-consuming<br>Tracking not easy to think of |                                                                    |
|                                                                                                                     | Tracking in day sections (e.g. breakfast or dinner)                                                                                    |                                                                    |
| Comparison of visual feedback with other users (= motivating for attaining goals)                                   | App use in the beginning exciting, but fast boring                                                                                     |                                                                    |
| Adding missing food in the food database                                                                            | Food group beverages: No sugar sweetened beverages count to the liquid supply                                                          |                                                                    |
| Collection badges promotes self-confidence                                                                          | Badges: Meaning incomprehensible                                                                                                       |                                                                    |
| (Daily and weekly) visual feedback (actual vs. target) promotes awareness of consumption                            |                                                                                                                                        | Additional evaluation charts, e.g. calorie needs consumption chart |
| (Daily and weekly) visual feedback (actual vs. target) is used as consumption orientation and promotes self-control |                                                                                                                                        |                                                                    |
|                                                                                                                     |                                                                                                                                        | Nutrient-related information to foods, evaluation of food          |
| Reminders: Individually and adjustable                                                                              |                                                                                                                                        | Expand reminders                                                   |
|                                                                                                                     |                                                                                                                                        | Healthy recipes                                                    |
|                                                                                                                     |                                                                                                                                        | Shopping tips                                                      |
|                                                                                                                     | Lack of personalization                                                                                                                | Personalization (e.g. age, height, weight)                         |
| Favorites: Facilitate tracking from too much consumed food                                                          |                                                                                                                                        |                                                                    |
| Pictures of serving sizes: Orientation and inspiration for consumption ideas                                        |                                                                                                                                        |                                                                    |
| Visual design                                                                                                       |                                                                                                                                        |                                                                    |

|                                    |  |  |
|------------------------------------|--|--|
| Usability = easy and uncomplicated |  |  |
|------------------------------------|--|--|

## Results study 2 (n= 210)

### Operating system

Table 1 Operating system (n= 210)

| Operating system | Number of participants |
|------------------|------------------------|
| Android          | 160                    |
| iOS              | 38                     |
| Android and iOS  | 2                      |
| Windows Phone    | 6                      |
| Other            | 2                      |
| No Mobile phone  | 2                      |

### Mobile phone Tariffs

Table 2 Mobile phone Tariffs (n= 204, no data provided n= 6))

| Operating system              | Number of participants |
|-------------------------------|------------------------|
| Prepaid                       | 41                     |
| Flat rate < 500 MB            | 53                     |
| Flat rate > 501 MB            | 70                     |
| Flat rate > 501 MB and others | 1                      |
| Others                        | 39                     |

### Favorite apps

Overall, participants (n= 204, no data provided n= 6) specified 793 apps, including 160 different apps. The following list shows apps that were named three times and more:

- |                               |                          |                           |
|-------------------------------|--------------------------|---------------------------|
| 1. WhatsApp (n= 186)          | 9. Clash of Kings (n= 8) | 19. Spotify (n= 3)        |
| 2. Facebook (n= 124)          | 10. DB Navigator (n= 7)  | 20. Retrica (n= 3)        |
| 3. Instagram (n= 88)          | 11. Google (n= 7)        | 21. Mp3Player (n= 3)      |
| 4. Snapchat (n= 60)           | 12. PokémonGo (n= 7)     | 22. 4 Bilder 1Wort (n= 3) |
| 5. Youtube (n= 57)            | 13. Lovoo (n= 5)         | 23. 9gag (n= 3)           |
| 6. Clash of Clans (n= 12)     | 14. Units (n= 5)         | 24. Musical.ly (n= 3)     |
| 7. Facebook Messenger (n= 10) | 15. Skype (n= 5)         | 25. Deezer Music (n= 3)   |
| 8. Twitter (n= 9)             | 16. Amazon (n= 4)        | 26. Hay Day (n= 3)        |
|                               | 17. Candy Crush (n= 4)   |                           |
|                               | 18. Messenger (n= 3)     |                           |

## Experiences with apps in the field of nutrition

54 of the participants have experiences with apps in the field of nutrition (no information provided n= 2). 23 different apps were specified by 26 participants.

Table 3 Apps in the field of nutrition (n= 26)

| Category                       | Apps                                                                                                                                                                             |
|--------------------------------|----------------------------------------------------------------------------------------------------------------------------------------------------------------------------------|
| <b>Food waste</b>              | Beste Reste (n= 1); Zu gut für die Tonne (n= 1)                                                                                                                                  |
| <b>Fast food</b>               | Burger King (n= 1)                                                                                                                                                               |
| <b>Recipes</b>                 | Chefkoch (n= 25); Kochbar (n= 1); Kptn Cook (n= 1)                                                                                                                               |
| <b>Weight control and diet</b> | Noom Coach (n= 1); Weight Watchers (n= 1); Diätplan (n= 1); Ernährungsplan (n= 1); FatSecret (n= 1); FDDB-Extender (Kalorien-Kalender) (n= 1); Was ich esse (n= 1); Yazio (n= 4) |
| <b>Food ingredients</b>        | Codecheck (n= 1)                                                                                                                                                                 |
| <b>Preparation help</b>        | Eier Uhr (n= 1)                                                                                                                                                                  |
| <b>Ordering service</b>        | Lieferheld (n= 3)                                                                                                                                                                |
| <b>Nutrition and fitness</b>   | Fit-Trio (n= 1); Fitness Coach (n= 1); Fitness Lounge (n= 1); S-Health (n= 4); MyFitnessPal (n= 1)                                                                               |
| <b>Social media</b>            | Pinterest (n= 1)                                                                                                                                                                 |

## Importance of app characteristics

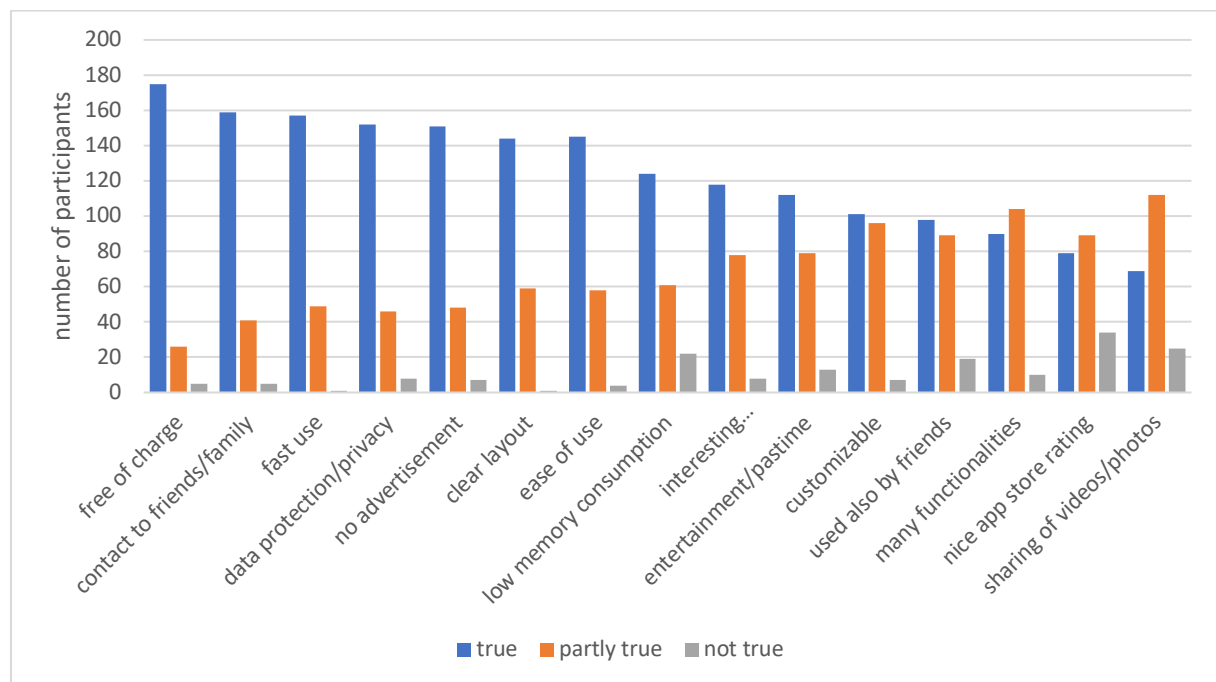

Figure 1 Importance of app characteristics

Table 4 Importance of app characteristics

|                                  | True | Partly true | Not true | No data |
|----------------------------------|------|-------------|----------|---------|
| <b>Free of charge</b>            | 175  | 26          | 5        | 4       |
| <b>Contact to friends/family</b> | 159  | 41          | 5        | 5       |
| <b>Fast use</b>                  | 157  | 49          | 1        | 3       |
| <b>Data protection/privacy</b>   | 152  | 46          | 8        | 4       |
| <b>No advertisement</b>          | 151  | 48          | 7        | 4       |

|                                |     |     |    |   |
|--------------------------------|-----|-----|----|---|
| Clear layout                   | 144 | 59  | 1  | 6 |
| Ease of use                    | 145 | 58  | 4  | 3 |
| Low memory consumption         | 124 | 61  | 22 | 3 |
| Interesting info/functionality | 118 | 78  | 8  | 6 |
| Entertainment/pastime          | 112 | 79  | 13 | 6 |
| Customizable                   | 101 | 96  | 7  | 6 |
| Used also by friends           | 98  | 89  | 19 | 4 |
| Many functionalities           | 90  | 104 | 10 | 6 |
| Nice app store rating          | 79  | 89  | 34 | 8 |
| Sharing of videos/photos       | 69  | 112 | 25 | 4 |

### Interesting topics in the field of nutrition

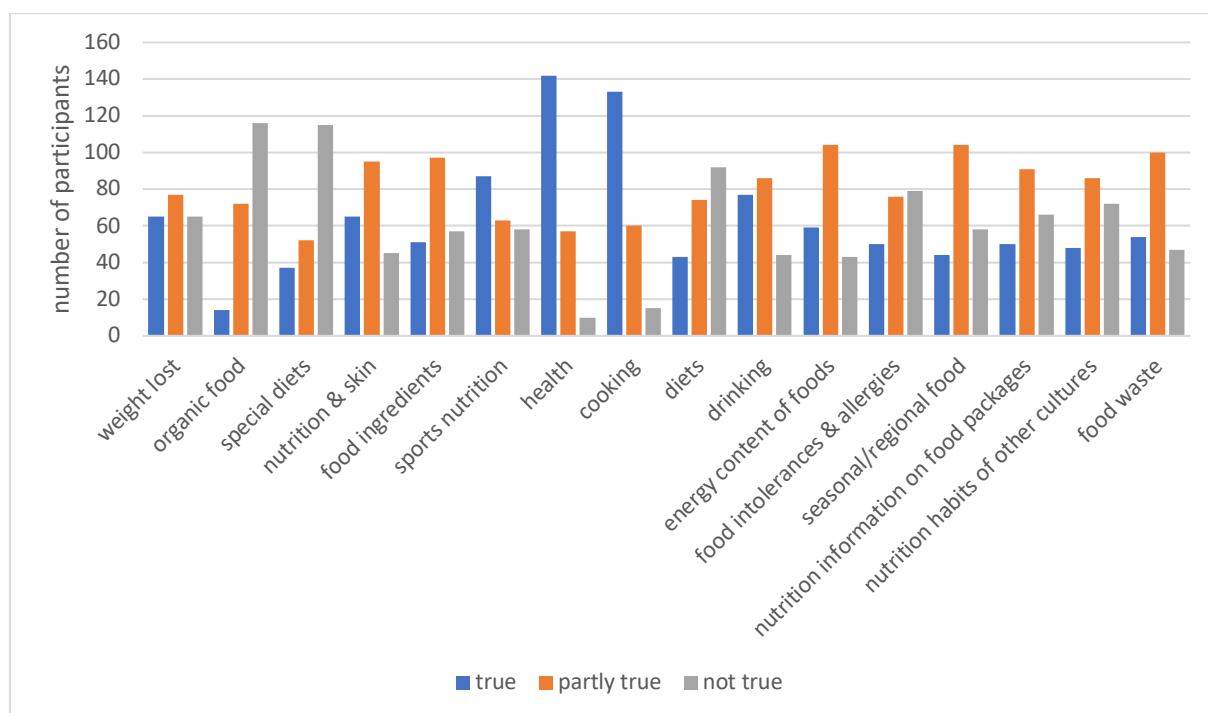

Figure 2 Interesting topics in the field of nutrition

Table 5 Interesting topics in the field of nutrition

|                         | True | Partly true | Not true | No data |
|-------------------------|------|-------------|----------|---------|
| Weight lost             | 65   | 77          | 65       | 3       |
| Organic food            | 14   | 72          | 116      | 8       |
| Special diets           | 37   | 52          | 115      | 6       |
| Nutrition and skin      | 65   | 95          | 45       | 5       |
| Food ingredients        | 51   | 97          | 57       | 5       |
| Sports nutrition        | 87   | 63          | 58       | 2       |
| Health                  | 142  | 57          | 10       | 1       |
| Cooking                 | 133  | 60          | 15       | 2       |
| Diets                   | 43   | 74          | 92       | 1       |
| Drinking                | 77   | 86          | 44       | 3       |
| Energy content of foods | 59   | 104         | 43       | 4       |

|                                           |    |     |    |   |
|-------------------------------------------|----|-----|----|---|
| <b>Food intolerances and allergies</b>    | 50 | 76  | 79 | 5 |
| <b>Seasonal/regional food</b>             | 44 | 104 | 58 | 4 |
| <b>Nutrition info on food packages</b>    | 50 | 91  | 66 | 3 |
| <b>Nutrition habits of other cultures</b> | 48 | 86  | 72 | 4 |
| <b>Food waste</b>                         | 54 | 100 | 47 | 9 |

### Nutritional values

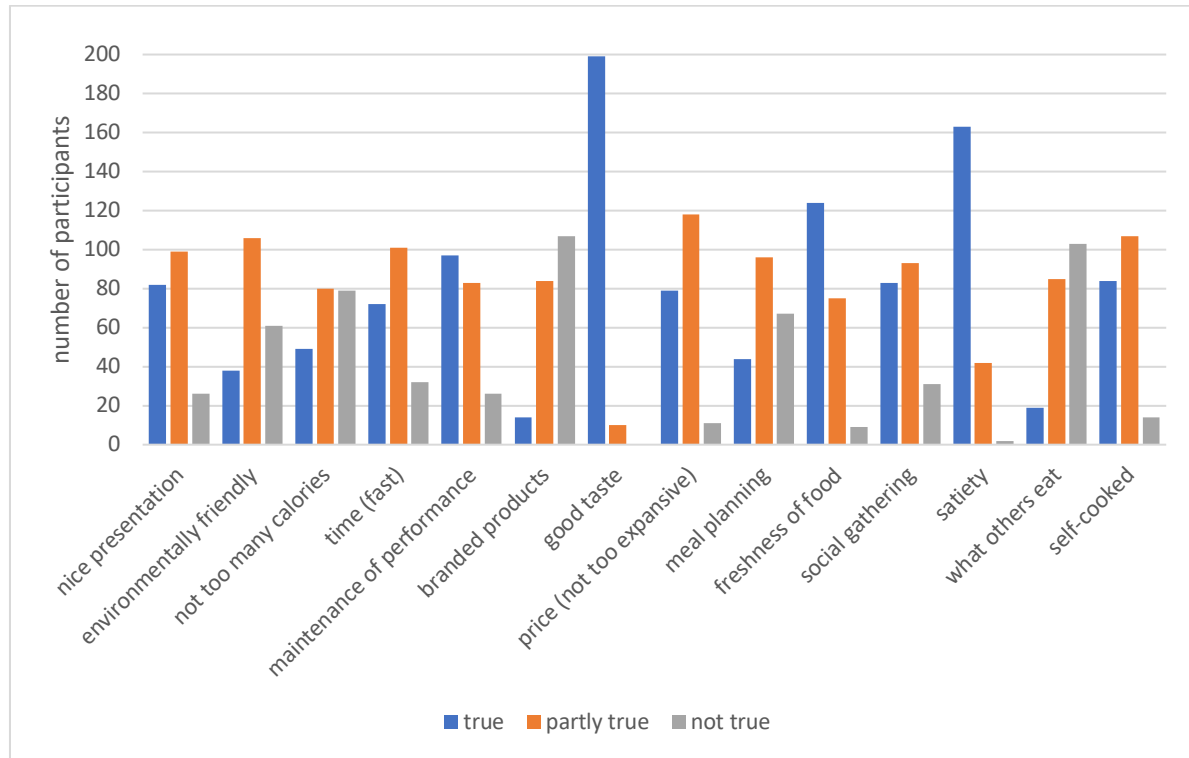

Figure 3 Nutritional value

Table 6 Nutritional values

|                                   | <b>True</b> | <b>Partly true</b> | <b>Not true</b> | <b>No data</b> |
|-----------------------------------|-------------|--------------------|-----------------|----------------|
| <b>Nice presentation</b>          | 82          | 99                 | 26              | 3              |
| <b>Environmentally friendly</b>   | 38          | 106                | 61              | 5              |
| <b>Not too many calories</b>      | 49          | 80                 | 79              | 2              |
| <b>Time (fast)</b>                | 72          | 101                | 32              | 5              |
| <b>Maintenance of performance</b> | 97          | 83                 | 26              | 4              |
| <b>Branded products</b>           | 14          | 84                 | 107             | 5              |
| <b>Good taste</b>                 | 199         | 10                 | 0               | 1              |
| <b>Price (not too expensive)</b>  | 79          | 118                | 11              | 2              |
| <b>Meal planning</b>              | 44          | 96                 | 67              | 3              |
| <b>Freshness of food</b>          | 124         | 75                 | 9               | 2              |
| <b>Social gathering</b>           | 83          | 93                 | 31              | 3              |
| <b>Satiety</b>                    | 163         | 42                 | 2               | 3              |
| <b>What others eat</b>            | 19          | 85                 | 103             | 3              |
| <b>Self-cooked</b>                | 84          | 107                | 14              | 5              |
